# Supplementary material
Source: MDPI journal article supplement (https://www.mdpi.com/1996-1073/17/7/1616)
Supplement: s1 [file s1]

## Supplementary information

**Table S1.** Summary of the testing protocol used to cycle the pouch cells. Constant current (CC) and constant voltage (CV) phases are specified in the description of the charge conditions and finalization criteria.

| Experiment                     | Cycle number | Discharge C-rate | Discharge finalization criteria | Charge conditions      | Charge finalization criteria |
|--------------------------------|--------------|------------------|---------------------------------|------------------------|------------------------------|
| Formation                      | 0            | 0.05C            | V = 2.8 V                       | CC: 0.05C<br>CV: 4.2 V | CC: 4.2 V<br>CV: 0.025C      |
| Rate-capability                | 1-3          | 0.1C             | V = 2.8 V                       | CC: 0.1C<br>CV: 4.2 V  | CC: 4.2 V<br>CV: 0.05C       |
|                                | 4-6          | 0.33C            | V = 2.8 V                       | CC: 0.33C<br>CV: 4.2 V | CC: 4.2 V<br>CV: 0.1C        |
|                                | 7-9          | 0.5C             | V = 2.8 V                       | CC: 0.33C<br>CV: 4.2 V | CC: 4.2 V<br>CV: 0.1C        |
|                                | 10-12        | 1C               | V = 2.8 V                       | CC: 0.33C<br>CV: 4.2 V | CC: 4.2 V<br>CV: 0.1C        |
|                                | 13           | 0.33C            | V = 2.8 V                       | CC: 0.33C<br>CV: 4.2 V | CC: 4.2 V<br>CV: 0.1C        |
|                                | 14-16        | 2C               | V = 2.8 V                       | CC: 0.33C<br>CV: 4.2 V | CC: 4.2 V<br>CV: 0.1C        |
| Cycling                        | 17           | 0.33C            | V = 2.8 V                       | CC: 0.33C<br>CV: 4.2 V | CC: 4.2 V<br>CV: 0.1C        |
|                                | 18-26        | 1C               | V = 2.8 V                       | CC: 0.33C<br>CV: 4.2 V | CC: 4.2 V<br>CV: 0.1C        |
| Loop to cycle 17 until 80% SOH |              |                  |                                 |                        |                              |

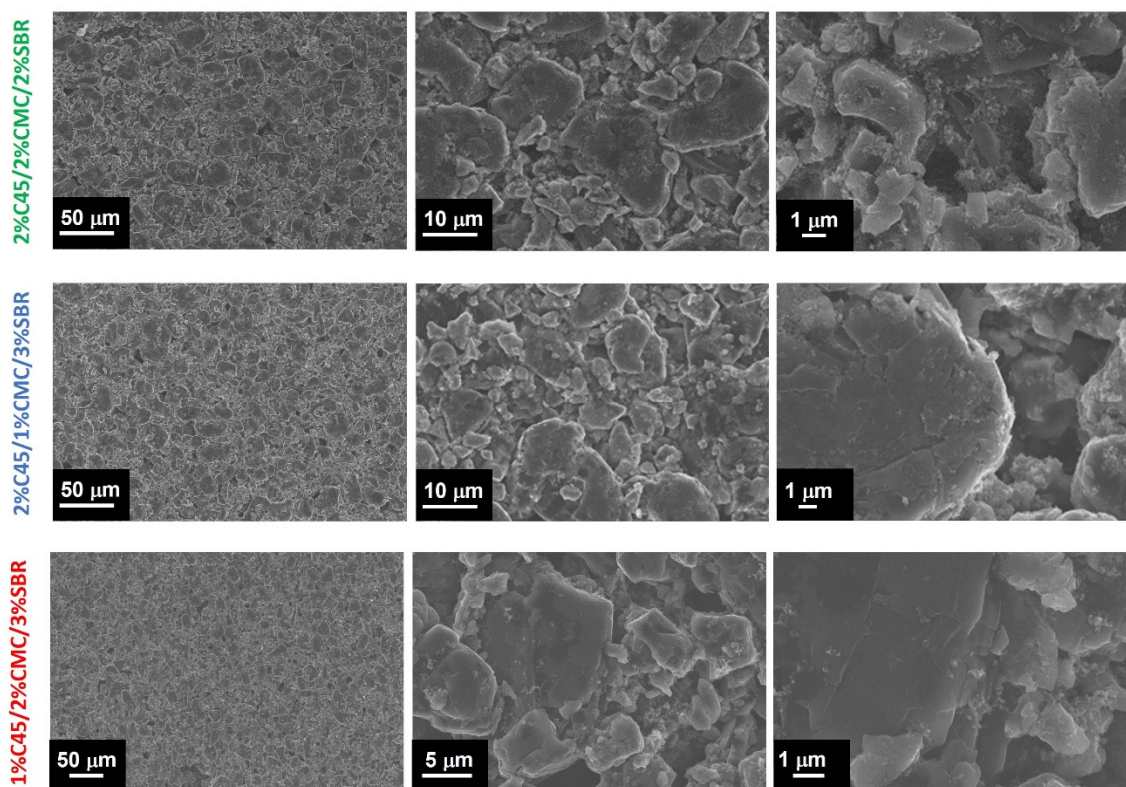

**Figure S1.** FE-SEM images of the (a-c) C2/D2/B2, (d-f) C2/D1/B3, and (g-i) C2/D1/B3 electrodes under different magnifications.

**Table S2.** Summary of the results of the different experiments to evaluate the performance of the anodes with different electrochemically inactive component fractions.

| Formulation | Peel strength | Dispersion | Lithiation/delithiation capacity | First cycle efficiency |
|-------------|---------------|------------|----------------------------------|------------------------|
| C2/D2/B2    | Lowest        | Acceptable | Acceptable                       | Lowest                 |
| C1/D2/B3    | Highest       | Acceptable | Lowest                           | Intermediate           |
| C2/D1/B3    | Acceptable    | Acceptable | Acceptable                       | Highest                |

**Table S3.** Peel test results for the coatings with and without SWCNT.

| Material           | Adhesion strength (N/m) |
|--------------------|-------------------------|
| No SWCNTs          | $9.2 \pm 2.7$           |
| SWCNTs Tuball 0.4% | $17.3 \pm 1.3$          |

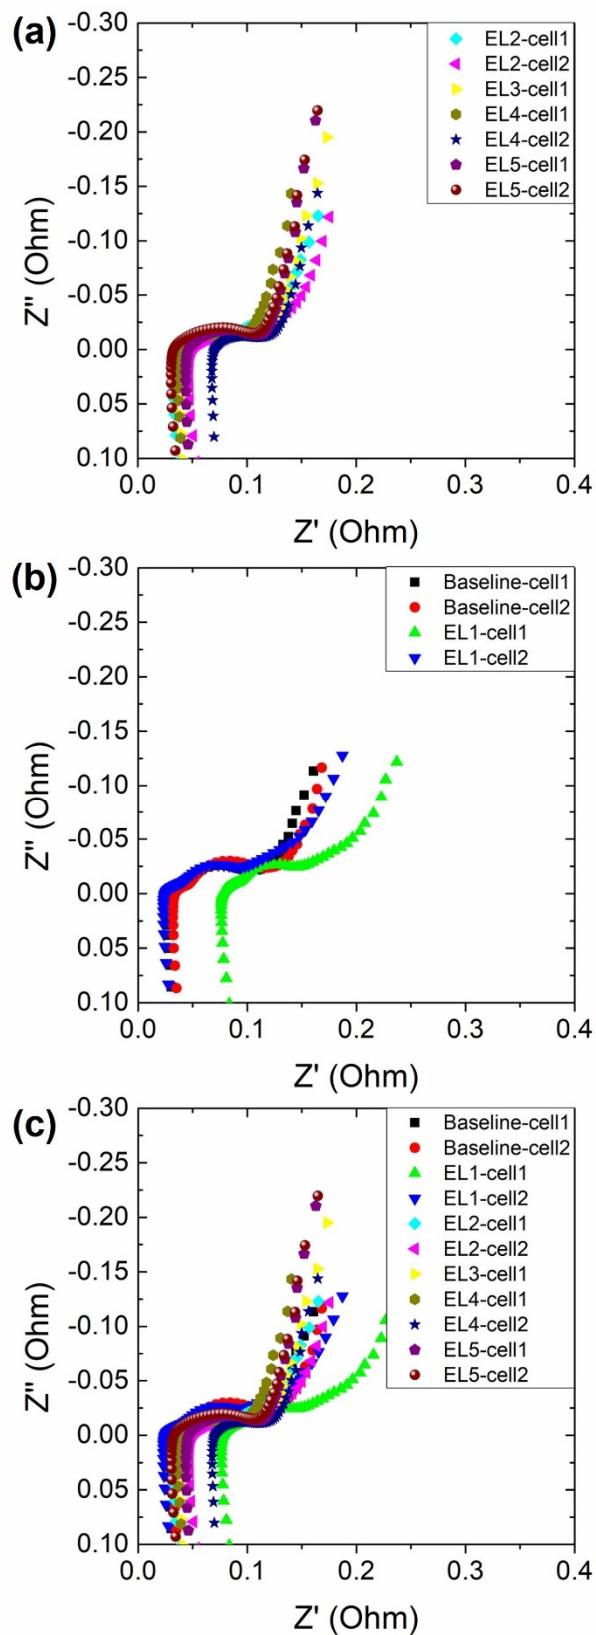

**Figure S2.** Nyquist diagrams obtained by the end of life of the cells. (a) All the cells, (b) only the cells with EL1 and the Baseline electrolyte, and (c) only the cells with the electrolytes EL2, EL3, EL4, and EL5.

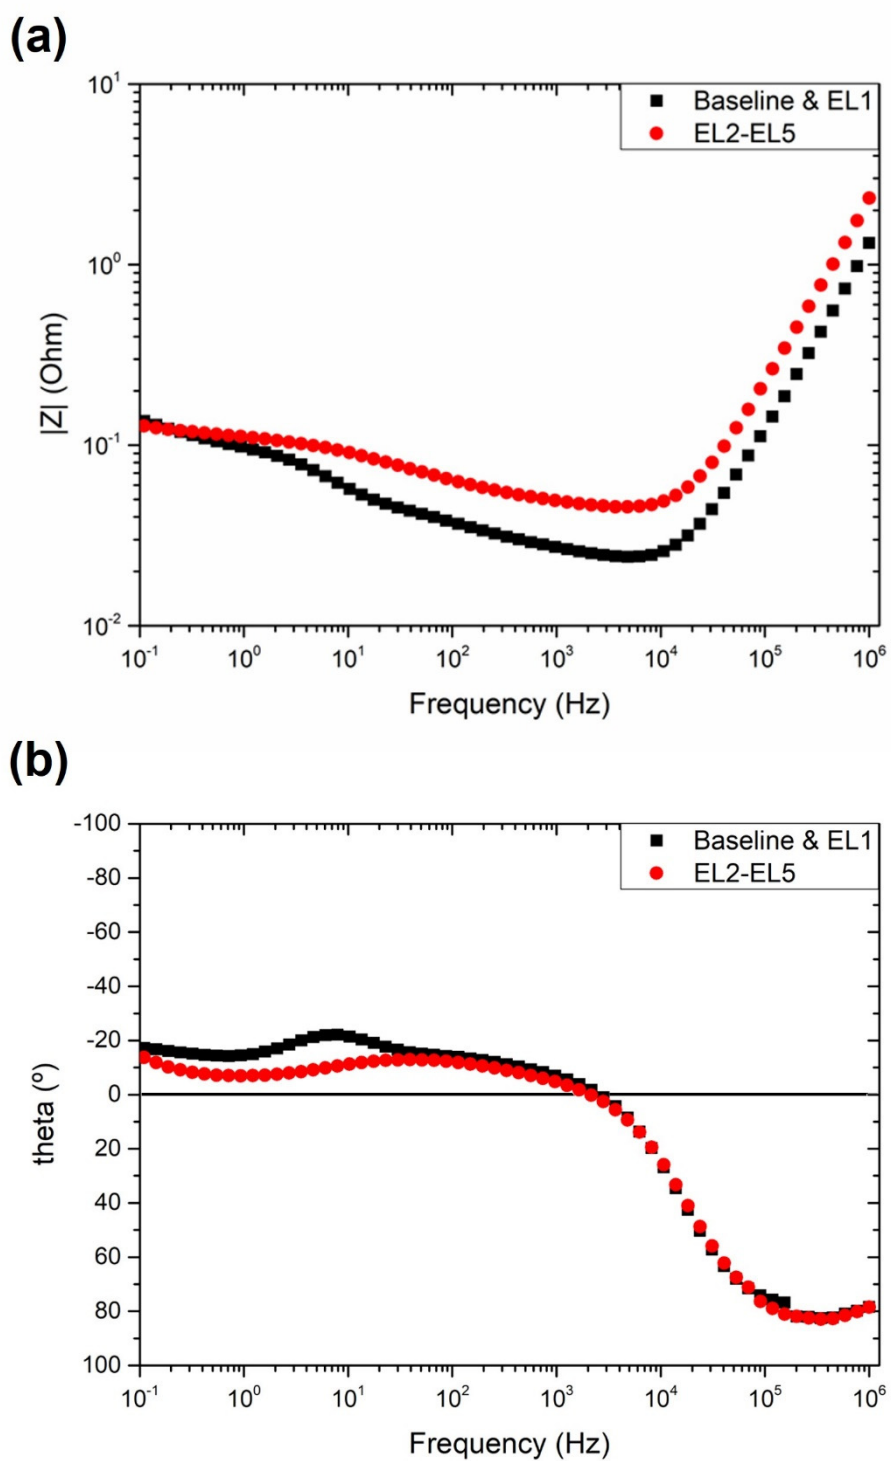

**Figure S3.** Examples of Bode diagrams obtained by the end of life of the cells with Baseline and EL1 electrolytes (black dots) and EL2-EL5 electrolytes (red dots).
